# Supplementary material
Source: bioRxiv or medRxiv preprint supplement (https://medrxiv.org/highwire/filestream/79966/field_highwire_adjunct_files/6/2020.04.19.20069997-7.pdf)
Supplement: Supplementary file [file 2020.04.19.20069997-7.pdf]

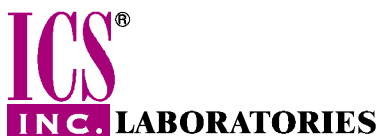

Test Report No. T14511-01-1 Issue 1  
Instantaneous Filtration Efficiency Evaluation in  
General Accordance with NIOSH TEB-APR-STP-0059  
Dana Farber Cancer Institute  
Sanitized N95 Respirators (Four Models)  
10 April 2020

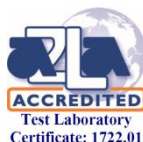

Authorized by:

Dale Pfriem  
President  
ICS Laboratories, Inc.

Performed by:

Tyler Jenkins  
Analytical Chemist  
Respiratory and Chemical Protective Equipment

- a) Reports are issued pursuant to the ICS standard Terms and Conditions agreement.
- b) The contents of this test report are confidential. Reproduction of the report is prohibited except in full, unless approved in writing by ICS Laboratories, Inc.
- c) Unless otherwise indicated, the test results contained in this report apply only to the samples tested and not to lots or batches from which they were taken.
- d) Where applicable, test data provided by subcontractor is uniquely identified in the test report.
- e) Where applicable, test data not covered under our ISO/IEC 17025 Accreditation is uniquely identified in the test report.

**WARNING:** This Test Report may contain technical data whose export is restricted by the Arms Export Control Act (Title 22, U.S. C., Sec 2751, et seq.) or the Export Administration Act of 1979, as amended, Title 50, U.S.C., App. 2401 et seq. and which may not be exported, released or disclosed to non-U.S. persons (i.e. persons who are not U.S. citizens or lawful permanent residents ["green card" holders]) inside or outside the United States, without first obtaining an export license. Violations of these export laws are subject to severe civil, criminal and administrative penalties.

Issued to: Dana Farber Cancer Institute  
 450 Brookline Ave  
 Boston, MA 02215  
 USA

Date: 10 April 2020  
 Report: T14511-01-1  
 Issue: 1  
 Page: 1 of 3

**Summary:**

16 sanitized N95 respirators were tested for instantaneous filtration efficiency in general accordance with NIOSH standard TEB-APR-STP-0059. The samples were submitted by the Dana Farber Cancer Institute. All 16 masks met N95 efficiency requirements allowing < 5% maximum penetration across all instantaneous trials.

**Objectives:**

Testing to: *NIOSH Procedure No TEB-APR-STP-0059*, “Determination of Particulate Filter Efficiency Level for N95 Series Filters against Solid Particulates for Non-Powered, Air-Purifying Respirators Standard Testing Procedure” Revision 3.2, 13 December 2019.

**Materials:**

| <i>Item</i>                | <i>Description</i>                    | <i>Quantity</i> |
|----------------------------|---------------------------------------|-----------------|
| 3M 1860 N95 Respirator     | Teal sanitized N95 respirator         | 8               |
| 3M 8210+ N95 Respirator    | White sanitized N95 respirator        | 4               |
| Halyard 46767 N95 Duckbill | Pink & white sanitized N95 respirator | 2               |
| Gerson 2130 N95 Respirator | White sanitized N95 respirator        | 2               |

Date provided by the Client: 3 April 2020  
 Date Testing Authorized: 1 April 2020  
 Dates of tests: 8 April 2020  
 Manufacturer/Supplier: Dana Farber Cancer Institute

**Equipment:**

*TSI 8130A Filter Tester*, test bench configured for sodium chloride aerosol (EQ1279).  
*Mask Fixture*, Custom design ICS Labs  
*Humidity chamber*, Envirotronics (EQ0327)  
*Sodium Chloride*, 99+%, Fisher Chemical, (C0015-03)

**Procedure:**

All tests were conducted in a standard laboratory atmosphere unless otherwise specified. The equipment and instrument calibrations were verified current and within specification prior to use. The materials for assessment were inventoried and logged upon receipt. Sample ID’s were assigned by Dana Farber Cancer Institute.

The equipment and instrument calibrations for sodium chloride penetration were verified current and within specification prior to use. All testing procedures were in general accordance with those specified in NIOSH Procedure No TEB-APR-STP-0059.

Masks were challenged to a sodium chloride aerosol neutralized to a Boltzmann equilibrium state at 25 +/- 5°C and a relative humidity of 30 +/- 10%. Particle size distribution was verified to be a count median diameter of 0.075 +/- 0.020 microns, with a geometric standard deviation not exceeding 1.86.

The masks were conditioned at 85% +/- 5% relative humidity and 38°C +/- 2°C for 25 hours prior to the filter efficiency test. Each mask was then assembled into a fixture and subjected to instantaneous aerosol loading.

Issued to: Dana Farber Cancer Institute  
 450 Brookline Ave  
 Boston, MA 02215  
 USA

Date: 10 April 2020  
 Report: T14511-01-1  
 Issue: 1  
 Page: 2 of 3

**Procedure (cont.):**

The loading was performed by depositing sodium chloride aerosol at an airflow rate of 85 LPM for one minute. Flow rate was maintained at 85 LPM +/- 2 LPM. The flow rate, initial resistance, and initial penetration data were recorded.

**Results:**

Table I outlines the results of the instantaneous efficiency tests.

**Table I**  
 Instantaneous Sodium Chloride Filter Efficiency Results for sanitized N95 respirators

| <i>Respirator,<br/>Make &amp;<br/>Model</i> | <i>Sanitation Cycle<br/>Information</i> | <i>Flow Rate<br/>(LPM)</i> | <i>Resistance<br/>(mm of H<sub>2</sub>O)</i> | <i>Instantaneous<br/>Penetration<br/>(%)</i> | <i>Instantaneous<br/>Filter Efficiency<br/>(%)</i> | <i>Result</i> |
|---------------------------------------------|-----------------------------------------|----------------------------|----------------------------------------------|----------------------------------------------|----------------------------------------------------|---------------|
| 3M 1860                                     | 1-1-D 1X                                | 86                         | 10.4                                         | 0.74                                         | 99.26                                              | Pass          |
| 3M 1860                                     | Top Rack Row 1-1-G #2                   | 86                         | 9.5                                          | 0.38                                         | 99.62                                              | Pass          |
| 3M 1860                                     | 1-3-A 1X                                | 86                         | 10.1                                         | 0.91                                         | 99.09                                              | Pass          |
| 3M 1860                                     | 1X Bottom                               | 86                         | 11.4                                         | 0.64                                         | 99.36                                              | Pass          |
| 3M 1860                                     | 1-1-4 A or B 2X #1                      | 86                         | 10.9                                         | 0.92                                         | 99.08                                              | Pass          |
| 3M 1860                                     | 1-1-A 2X                                | 86                         | 9.3                                          | 0.60                                         | 99.40                                              | Pass          |
| 3M 1860                                     | ? Top 2X                                | 86                         | 9.9                                          | 0.31                                         | 99.69                                              | Pass          |
| 3M 1860                                     | ? Bottom 2X                             | 86                         | 9.6                                          | 0.38                                         | 99.62                                              | Pass          |
| 3M 8210+                                    | 2-4-C 1X                                | 86                         | 8.9                                          | 0.27                                         | 99.73                                              | Pass          |
| 3M 8210+                                    | 2-5-C 2X                                | 86                         | 8.6                                          | 0.15                                         | 99.85                                              | Pass          |
| 3M 8210+                                    | 2-1-C 1X                                | 86                         | 8.8                                          | 0.21                                         | 99.79                                              | Pass          |
| 3M 8210+                                    | 2-1-C 2X                                | 86                         | 9.3                                          | 0.21                                         | 99.79                                              | Pass          |
| Hal 46767                                   | 2-1-F Top 2X                            | 86                         | 14.1                                         | 0.22                                         | 99.78                                              | Pass          |
| Hal 46767                                   | 2-5-D 1X                                | 86                         | 15.2                                         | 0.11                                         | 99.89                                              | Pass          |
| Ger 2130                                    | 2-1-B 1X                                | 86                         | 9.3                                          | 1.31                                         | 98.69                                              | Pass          |
| Ger 2130                                    | 2-3-A X                                 | 86                         | 7.9                                          | 2.57                                         | 97.43                                              | Pass          |
| <b>Specification:</b>                       |                                         | <b>81- 89</b>              |                                              | <b>≤ 5.0</b>                                 | <b>≥ 95.0</b>                                      |               |

Issued to: Dana Farber Cancer Institute  
450 Brookline Ave  
Boston, MA 02215  
USA

Date: 10 April 2020  
Report: T14511-01-1  
Issue: 1  
Page: 3 of 3

**Photographs:**

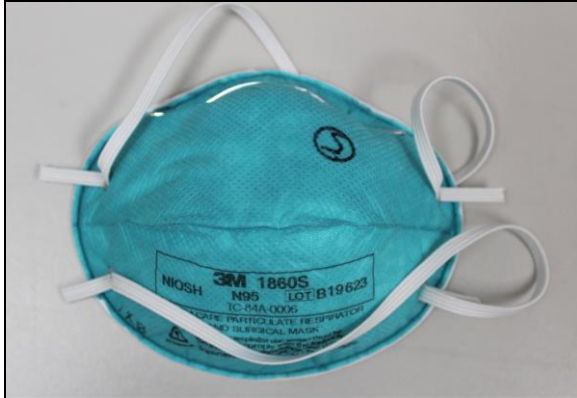

**Figure 1.** 3M 1860 Surgical N95 Respirator

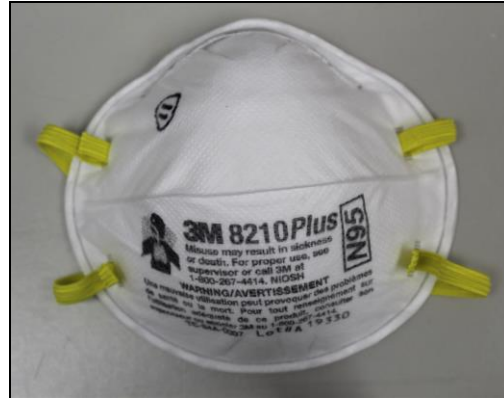

**Figure 2.** 3M 8210+ N95 Respirator

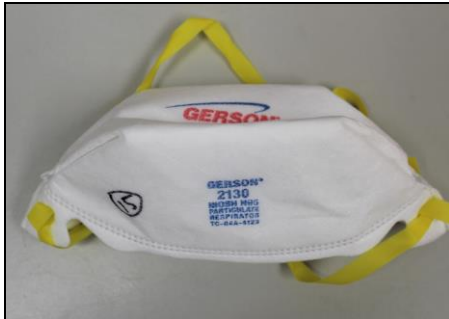

**Figure 3.** Gerson 2130 N95 Respirator

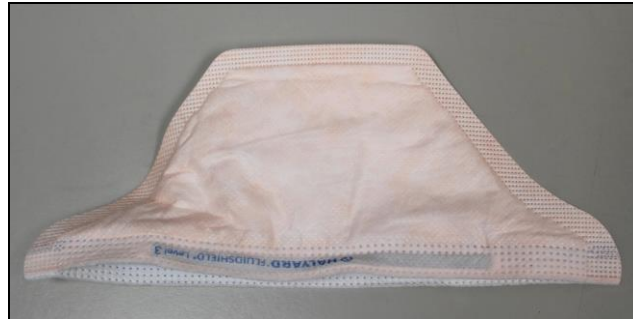

**Figure 4.** Halyard 46767 Duckbill N95

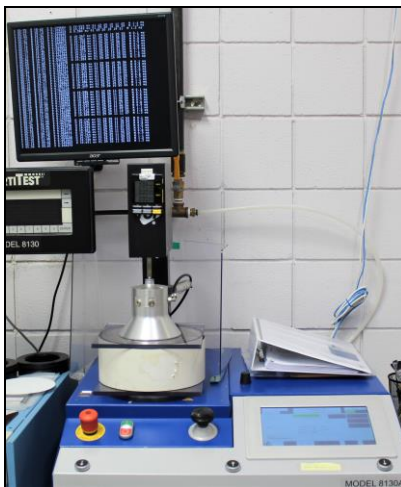

**Figure 5.** Typical setup for mask under test

## TERMS AND CONDITIONS

1. Client acknowledges that ICS Laboratories (ICS) performs testing services only as specified by Client. ICS does not design, warrant, supervise or monitor compliance of products or services except as specifically agreed to in writing. By their very nature, testing, analysis, and other ICS services are limited in scope and subject to expected measurement variability.
2. Client or Client's authorized representative shall be afforded the opportunity to clarify test requests and reasonable access to monitor test work, provisional to protecting the confidentiality of other clients.
3. ICS shall keep documents and information related to Client confidential and will not disclose any such information to third parties without Client permission. ICS will, however, disclose any such information in response to compulsory legal process after providing Client with a copy of such process.
4. ICS Reports apply only to the standards or procedures identified therein and to the sample (s) tested and or inspection (s) made. Test and/or inspection results are not indicative or representative of the qualities of the lot from which the sample was taken or of apparently identical or similar products.
5. ICS Test Reports and their insignia are for the exclusive use of the Client. Reports, in their entirety, may be utilized at the discretion of Clients and/or their authorized agents for purposes including, but not limited to, research & development, recordkeeping, product packaging, educational and promotional materials in various formats, certification, and compliance. As an accredited independent testing laboratory, ICS maintains an interest in preventing the misrepresentation of the contents of its test reports. As such, Clients may NOT use, reproduce or otherwise disseminate excerpted, partial, redacted or otherwise altered ICS test reports without the prior review of such use by ICS and the granting of its written approval. Further, Clients are prohibited from manipulating data and/or extrapolating-from-it statistics or conclusions that contradict or eclipse the empirical results of testing as reflected by the totality of the report. Clients are to refrain from utilizing ICS Test Reports and/or the ICS logo in a manner that suggests any extra-report conclusions are provided and/or endorsed by ICS Laboratories.
6. Any use by Client of ICS's Reports or the information contained therein is conditioned on timely payment of all fees.
7. The name(s) listed as the "Issued to" party on test reports may not reflect the actual entity submitting and/or contracting the assessment.
8. ICS shall retain copies of testing job files (including reports) for a period of at least six (6) years and when applicable, evidentiary test samples for the length of time as deemed appropriate after which time they may be disposed of at management's discretion. If Client requests additional copies of Reports during this period, an additional charge will apply for the preparation and delivery of such reports.
9. Test reports are valid for certification purposes for one year from date of issue, inclusive of retest or variant additions which must be performed within one year of date of issue to avoid full retest.
10. Client is responsible for procuring, at its cost, insurance protecting the value of its property and samples.
11. For the safety of our personnel, Client must advise if samples are known or suspected to contain hazardous substances. Safety Data Sheets must be provided upon request if available.
12. ICS represents that Services shall be performed within the limits agreed with Client, and in a manner consistent with good laboratory practice. **NO OTHER REPRESENTATIONS TO CLIENT, EXPRESS OR IMPLIED, AND NO WARRANTY OR GUARANTEE IS INCLUDED OR INTENDED IN THIS**
13. ICS hereby objects to any conflicting terms contained in any order or acceptance submitted by Client.
14. Schedules are confirmed upon acceptance of quotation. All reasonable efforts will be made to comply with conferred schedule. Guarantees are neither implied nor promised.
15. Certain work may be subcontracted to ICS authorized affiliate laboratories as required or applicable. Client will be made aware of subcontracted work.
16. Client agrees to pay any and all additional costs associated with unexpected or above-standard communications and/or consultations with Client or third parties as designated by Client.
17. Client agrees to pay any and all additional costs for work additional to the original scope of work as agreed to by Client.
18. Client understands and agrees that ICS, in entering into this Contract and by performing services hereunder, does not assume, abridge, abrogate or undertake to discharge any duty or responsibility of Client to any other party or parties. No one other than Client shall have any right to rely on any Report or other representation of conduct of ICS and ICS disclaims any obligations of any nature whatsoever with respect to such person.
19. Client agrees, in consideration of ICS undertaking to perform the test(s) hereunder, to protect, defend and indemnify ICS from any and all claims, damages, expenses either direct or consequential for injuries to persons or property arising out of or in consequence of the performance of the testing, inspection and reporting hereunder and/or the performance of the products tested or inspected hereunder, **UNLESS CAUSED BY THE NEGLIGENCE OF ICS.**
20. **IT IS AGREED THAT IF ICS SHOULD BE FOUND LIABLE FOR ANY LOSSES OR DAMAGES ATTRIBUTABLE TO THE SERVICES HEREUNDER IN ANY RESPECT, ITS LIABILITY SHALL IN NO EVENT EXCEED THE AMOUNT OF THE FEE PAID BY CLIENT FOR SUCH SERVICES AND CLIENT'S SOLE REMEDY AT LAW OR IN EQUITY SHALL BE THE RIGHT TO RECOVER UP TO SUCH AMOUNT.**
21. Quotations are valid for 30 days from date of issue. Terms: 30% Laboratory/Testing fees invoiced and payable upon acceptance of quotation. Remaining fees invoiced and payable upon completion of services, 15 days net. Cancelled jobs will be invoiced for work performed and/or set-up costs incurred. Cancelled Purchase Orders are subject to 10% service charge. Shipping costs incurred by ICS will be invoiced at cost +10% handling fee. A minimum USD \$25.00 handling fee will be also invoiced. For shipping costs incurred by Client, ICS will invoice a minimum USD \$25.00 handling fee.
22. In the event that payment is not received within 15 days of invoice date, Client agrees to pay a late payment charge on the unpaid balance equal to 1-1/2% per month or the maximum charge allowed by law, whichever is less, and all costs and expenses, including attorney's fees where recovery of the same is not prohibited by law, incurred by ICS in collecting such invoices.
23. All costs associated with compliance with any subpoena (s) for documents, testimony in a court of law, or for any other purpose relating to work performed by ICS in connection with work performed for that Client, shall be paid by Client. Client shall also pay ICS's then existing standard fee for consulting, deposition and trial testimony and all expenses related thereto.
24. Cancelled/discontinued orders: Client responsible for all administrative and testing charges up to point of cancellation.



Test Report No. T14511-01-2 Issue 1  
Instantaneous Filtration Efficiency Evaluation in  
General Accordance with NIOSH TEB-APR-STP-0059  
Dana Farber Cancer Institute  
Sanitized N95 Respirators (Two Models)  
11 April 2020

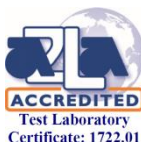

Authorized by:

Dale Pfriem  
President  
ICS Laboratories, Inc.

Performed by:

Tyler Jenkins  
Analytical Chemist  
Respiratory and Chemical Protective Equipment

- a) Reports are issued pursuant to the ICS standard Terms and Conditions agreement.
- b) The contents of this test report are confidential. Reproduction of the report is prohibited except in full, unless approved in writing by ICS Laboratories, Inc.
- c) Unless otherwise indicated, the test results contained in this report apply only to the samples tested and not to lots or batches from which they were taken.
- d) Where applicable, test data provided by subcontractor is uniquely identified in the test report.
- e) Where applicable, test data not covered under our ISO/IEC 17025 Accreditation is uniquely identified in the test report.

**WARNING:** This Test Report may contain technical data whose export is restricted by the Arms Export Control Act (Title 22, U.S. C., Sec 2751, et seq.) or the Export Administration Act of 1979, as amended, Title 50, U.S.C., App. 2401 et seq. and which may not be exported, released or disclosed to non-U.S. persons (i.e. persons who are not U.S. citizens or lawful permanent residents ["green card" holders]) inside or outside the United States, without first obtaining an export license. Violations of these export laws are subject to severe civil, criminal and administrative penalties.

Issued to: Dana Farber Cancer Institute  
 450 Brookline Ave  
 Boston, MA 02215  
 USA

Date: 11 April 2020  
 Report: T14511-01-2  
 Issue: 1  
 Page: 1 of 3

**Summary:**

7 sanitized N95 respirators were tested for instantaneous filtration efficiency in general accordance with NIOSH standard TEB-APR-STP-0059. The samples were submitted by the Dana Farber Cancer Institute. All 7 masks met N95 efficiency requirements allowing < 5% maximum penetration across all instantaneous trials.

**Objectives:**

Testing to: *NIOSH Procedure No TEB-APR-STP-0059*, “Determination of Particulate Filter Efficiency Level for N95 Series Filters against Solid Particulates for Non-Powered, Air-Purifying Respirators Standard Testing Procedure” Revision 3.2, 13 December 2019.

**Materials:**

| <i>Item</i>                | <i>Description</i>                    | <i>Quantity</i> |
|----------------------------|---------------------------------------|-----------------|
| 3M 1860 N95 Respirator     | Teal sanitized N95 respirator         | 4               |
| Halyard 46767 N95 Duckbill | Pink & white sanitized N95 respirator | 3               |

Date provided by the Client: 7 April 2020  
 Date Testing Authorized: 7 April 2020  
 Dates of tests: 9 April 2020  
 Manufacturer/Supplier: Dana Farber Cancer Institute

**Equipment:**

*TSI 8130A Filter Tester*, test bench configured for sodium chloride aerosol (EQ1279).  
*Mask Fixture*, Custom design ICS Labs  
*Humidity chamber*, Envirotronics (EQ0327)  
*Sodium Chloride, 99+%*, Fisher Chemical, (C0015-03)

**Procedure:**

All tests were conducted in a standard laboratory atmosphere unless otherwise specified. The equipment and instrument calibrations were verified current and within specification prior to use. The materials for assessment were inventoried, numbered, and logged upon receipt.

The equipment and instrument calibrations for sodium chloride penetration were verified current and within specification prior to use. All testing procedures were in general accordance with those specified in NIOSH Procedure No TEB-APR-STP-0059.

Masks were challenged to a sodium chloride aerosol neutralized to a Boltzmann equilibrium state at 25 +/- 5°C and a relative humidity of 30 +/- 10%. Particle size distribution was verified to be a count median diameter of 0.075 +/- 0.020 microns, with a geometric standard deviation not exceeding 1.86.

The masks were conditioned at 85% +/- 5% relative humidity and 38°C +/- 2°C for 25 hours prior to the filter efficiency test. Each mask was then assembled into a fixture and subjected to instantaneous aerosol loading.

The loading was performed by depositing sodium chloride aerosol at an airflow rate of 85 LPM for one minute. Flow rate was maintained at 85 LPM +/- 2 LPM. The flow rate, initial resistance, and initial penetration data were recorded.

Issued to: Dana Farber Cancer Institute  
 450 Brookline Ave  
 Boston, MA 02215  
 USA

Date: 11 April 2020  
 Report: T14511-01-2  
 Issue: 1  
 Page: 2 of 3

**Results:**

Table I outlines the results of the instantaneous efficiency tests.

**Table I**  
 Instantaneous Sodium Chloride Filter Efficiency Results for sanitized N95 respirators

| <i>Respirator,<br/>Make &amp;<br/>Model</i> | <i>Sanitation Cycle<br/>Information</i> | <i>Flow Rate<br/>(LPM)</i> | <i>Resistance<br/>(mm of H<sub>2</sub>O)</i> | <i>Instantaneous<br/>Penetration<br/>(%)</i> | <i>Instantaneous<br/>Filter Efficiency<br/>(%)</i> | <i>Result</i> |
|---------------------------------------------|-----------------------------------------|----------------------------|----------------------------------------------|----------------------------------------------|----------------------------------------------------|---------------|
| <b>3M 1860-1-01</b>                         | <b>5 sanitation cycles</b>              | 86                         | 9.1                                          | 1.03                                         | 98.97                                              | Pass          |
| <b>3M 1860-1-02</b>                         | <b>5 sanitation cycles</b>              | 86                         | 8.8                                          | 0.60                                         | 99.40                                              | Pass          |
| <b>3M 1860-1-03</b>                         | <b>5 sanitation cycles</b>              | 86                         | 9.4                                          | 0.30                                         | 99.70                                              | Pass          |
| <b>3M 1860-2-01</b>                         | <b>2 sanitation cycles</b>              | 86                         | 9.2                                          | 0.45                                         | 99.55                                              | Pass          |
| <b>Hal 46767-3-01</b>                       | <b>5 sanitation cycles</b>              | 86                         | 14.5                                         | 0.12                                         | 99.88                                              | Pass          |
| <b>Hal 46767-3-02</b>                       | <b>5 sanitation cycles</b>              | 86                         | 13.5                                         | 0.10                                         | 99.90                                              | Pass          |
| <b>Hal 46767-3-03</b>                       | <b>5 sanitation cycles</b>              | 86                         | 15.0                                         | 0.12                                         | 99.88                                              | Pass          |
| <b>Specification:</b>                       |                                         | <b>81- 89</b>              |                                              | <b>≤ 5.0</b>                                 | <b>≥ 95.0</b>                                      |               |



Issued to: Dana Farber Cancer Institute  
450 Brookline Ave  
Boston, MA 02215  
USA

Date: 11 April 2020  
Report: T14511-01-2  
Issue: 1  
Page: 3 of 3

**Photographs:**

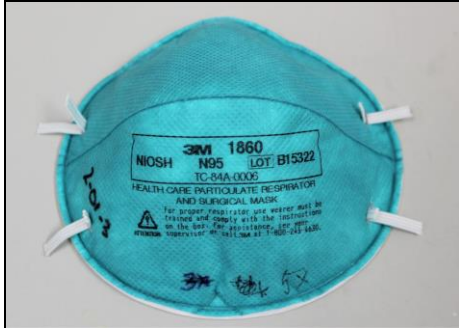

**Figure 1.** 3M 1860 Surgical N95 Respirator

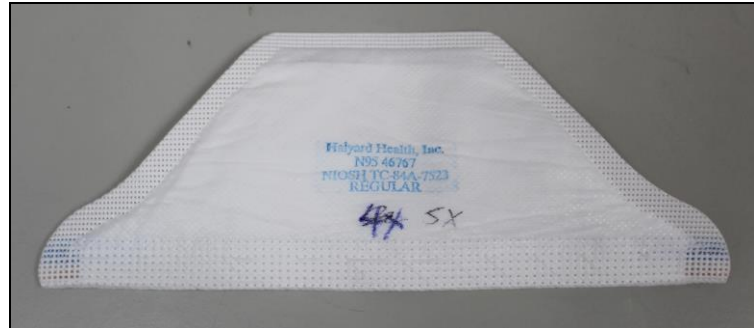

**Figure 2.** Halyard 46767 Duckbill N95

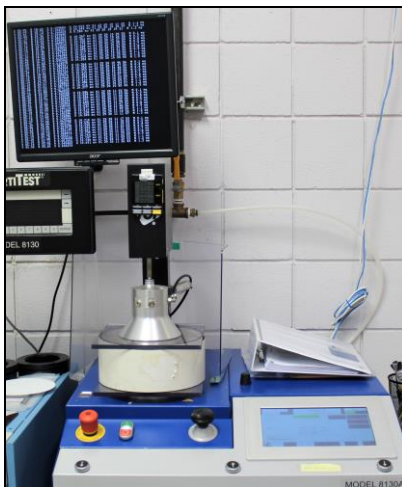

**Figure 3.** Typical setup for mask under test

## TERMS AND CONDITIONS

1. Client acknowledges that ICS Laboratories (ICS) performs testing services only as specified by Client. ICS does not design, warrant, supervise or monitor compliance of products or services except as specifically agreed to in writing. By their very nature, testing, analysis, and other ICS services are limited in scope and subject to expected measurement variability.
2. Client or Client's authorized representative shall be afforded the opportunity to clarify test requests and reasonable access to monitor test work, provisional to protecting the confidentiality of other clients.
3. ICS shall keep documents and information related to Client confidential and will not disclose any such information to third parties without Client permission. ICS will, however, disclose any such information in response to compulsory legal process after providing Client with a copy of such process.
4. ICS Reports apply only to the standards or procedures identified therein and to the sample (s) tested and or inspection (s) made. Test and/or inspection results are not indicative or representative of the qualities of the lot from which the sample was taken or of apparently identical or similar products.
5. ICS Test Reports and their insignia are for the exclusive use of the Client. Reports, in their entirety, may be utilized at the discretion of Clients and/or their authorized agents for purposes including, but not limited to, research & development, recordkeeping, product packaging, educational and promotional materials in various formats, certification, and compliance. As an accredited independent testing laboratory, ICS maintains an interest in preventing the misrepresentation of the contents of its test reports. As such, Clients may NOT use, reproduce or otherwise disseminate excerpted, partial, redacted or otherwise altered ICS test reports without the prior review of such use by ICS and the granting of its written approval. Further, Clients are prohibited from manipulating data and/or extrapolating-from-it statistics or conclusions that contradict or eclipse the empirical results of testing as reflected by the totality of the report. Clients are to refrain from utilizing ICS Test Reports and/or the ICS logo in a manner that suggests any extra-report conclusions are provided and/or endorsed by ICS Laboratories.
6. Any use by Client of ICS's Reports or the information contained therein is conditioned on timely payment of all fees.
7. The name(s) listed as the "Issued to" party on test reports may not reflect the actual entity submitting and/or contracting the assessment.
8. ICS shall retain copies of testing job files (including reports) for a period of at least six (6) years and when applicable, evidentiary test samples for the length of time as deemed appropriate after which time they may be disposed of at management's discretion. If Client requests additional copies of Reports during this period, an additional charge will apply for the preparation and delivery of such reports.
9. Test reports are valid for certification purposes for one year from date of issue, inclusive of retest or variant additions which must be performed within one year of date of issue to avoid full retest.
10. Client is responsible for procuring, at its cost, insurance protecting the value of its property and samples.
11. For the safety of our personnel, Client must advise if samples are known or suspected to contain hazardous substances. Safety Data Sheets must be provided upon request if available.
12. ICS represents that Services shall be performed within the limits agreed with Client, and in a manner consistent with good laboratory practice. **NO OTHER REPRESENTATIONS TO CLIENT, EXPRESS OR IMPLIED, AND NO WARRANTY OR GUARANTEE IS INCLUDED OR INTENDED IN THIS**
13. ICS hereby objects to any conflicting terms contained in any order or acceptance submitted by Client.
14. Schedules are confirmed upon acceptance of quotation. All reasonable efforts will be made to comply with conferred schedule. Guarantees are neither implied nor promised.
15. Certain work may be subcontracted to ICS authorized affiliate laboratories as required or applicable. Client will be made aware of subcontracted work.
16. Client agrees to pay any and all additional costs associated with unexpected or above-standard communications and/or consultations with Client or third parties as designated by Client.
17. Client agrees to pay any and all additional costs for work additional to the original scope of work as agreed to by Client.
18. Client understands and agrees that ICS, in entering into this Contract and by performing services hereunder, does not assume, abridge, abrogate or undertake to discharge any duty or responsibility of Client to any other party or parties. No one other than Client shall have any right to rely on any Report or other representation of conduct of ICS and ICS disclaims any obligations of any nature whatsoever with respect to such person.
19. Client agrees, in consideration of ICS undertaking to perform the test(s) hereunder, to protect, defend and indemnify ICS from any and all claims, damages, expenses either direct or consequential for injuries to persons or property arising out of or in consequence of the performance of the testing, inspection and reporting hereunder and/or the performance of the products tested or inspected hereunder, **UNLESS CAUSED BY THE NEGLIGENCE OF ICS.**
20. **IT IS AGREED THAT IF ICS SHOULD BE FOUND LIABLE FOR ANY LOSSES OR DAMAGES ATTRIBUTABLE TO THE SERVICES HEREUNDER IN ANY RESPECT, ITS LIABILITY SHALL IN NO EVENT EXCEED THE AMOUNT OF THE FEE PAID BY CLIENT FOR SUCH SERVICES AND CLIENT'S SOLE REMEDY AT LAW OR IN EQUITY SHALL BE THE RIGHT TO RECOVER UP TO SUCH AMOUNT.**
21. Quotations are valid for 30 days from date of issue. Terms: 30% Laboratory/Testing fees invoiced and payable upon acceptance of quotation. Remaining fees invoiced and payable upon completion of services, 15 days net. Cancelled jobs will be invoiced for work performed and/or set-up costs incurred. Cancelled Purchase Orders are subject to 10% service charge. Shipping costs incurred by ICS will be invoiced at cost +10% handling fee. A minimum USD \$25.00 handling fee will be also invoiced. For shipping costs incurred by Client, ICS will invoice a minimum USD \$25.00 handling fee.
22. In the event that payment is not received within 15 days of invoice date, Client agrees to pay a late payment charge on the unpaid balance equal to 1-1/2% per month or the maximum charge allowed by law, whichever is less, and all costs and expenses, including attorney's fees where recovery of the same is not prohibited by law, incurred by ICS in collecting such invoices.
23. All costs associated with compliance with any subpoena (s) for documents, testimony in a court of law, or for any other purpose relating to work performed by ICS in connection with work performed for that Client, shall be paid by Client. Client shall also pay ICS's then existing standard fee for consulting, deposition and trial testimony and all expenses related thereto.
24. Cancelled/discontinued orders: Client responsible for all administrative and testing charges up to point of cancellation.

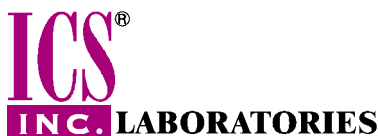

Test Report No. T14580-01-1 Issue 1  
Abbreviated Testing to NIOSH TEB-APR-STP-0059  
Dana Farber Cancer Institute  
Sanitized N95 Respirator, Various Models  
30 April 2020



Authorized by:

Dale Pfriem  
President  
ICS Laboratories, Inc.

Performed by:

Tyler Jenkins  
Analytical Chemist  
Respiratory and Chemical Protective Equipment

- a) Reports are issued pursuant to the ICS standard Terms and Conditions agreement.
- b) The contents of this test report are confidential. Reproduction of the report is prohibited except in full, unless approved in writing by ICS Laboratories, Inc.
- c) Unless otherwise indicated, the test results contained in this report apply only to the samples tested and not to lots or batches from which they were taken.
- d) Where applicable, test data provided by subcontractor is uniquely identified in the test report.
- e) Where applicable, test data not covered under our ISO/IEC 17025 Accreditation is uniquely identified in the test report.

**WARNING:** This Test Report may contain technical data whose export is restricted by the Arms Export Control Act (Title 22, U.S. C., Sec 2751, et seq.) or the Export Administration Act of 1979, as amended, Title 50, U.S.C., App. 2401 et seq. and which may not be exported, released or disclosed to non-U.S. persons (i.e. persons who are not U.S. citizens or lawful permanent residents ["green card" holders]) inside or outside the United States, without first obtaining an export license. Violations of these export laws are subject to severe civil, criminal and administrative penalties.

Issued to: Dana Farber Cancer Institute  
 375 Longwood Ave. 5<sup>th</sup> Floor  
 Boston, MA 02115  
 USA

Date: 30 April 2020  
 Report: T14580-01-1  
 Issue: 1  
 Page: 1 of 10

**Summary:**

Five sanitized N95 respirators were tested for instantaneous filtration efficiency and six sanitized N95 respirators were tested for full aerosol loading filter efficiency at the client’s request to an abbreviated form of NIOSH TEB-APR-STP-0059. The samples were submitted by the Dana Farber Cancer Institute. All respirators subjected to instantaneous and full loading conformed to N95 filtration efficiency allowing  $\leq 5\%$  penetration.

**Objectives:**

Abbreviated testing to: *NIOSH Procedure No TEB-APR-STP-0059*, “Determination of Particulate Filter Efficiency Level for N95 Series Filters against Solid Particulates for Non-Powered, Air-Purifying Respirators Standard Testing Procedure” Revision 3.2, 13 December 2019 [Five instantaneous loadings, six full loadings]

**Materials:**

| <i>Sample</i>                                   | <i>Description</i>                                        | <i>Qty</i> |
|-------------------------------------------------|-----------------------------------------------------------|------------|
| 3M 9210 Sanitized N95 Respirator                | White sanitized N95 respirator                            | 1          |
| Gerson 2130 Sanitized N95 Respirator            | White sanitized N95 respirator with elastic yellow straps | 1          |
| 3M 8210 Sanitized N95 Respirator                | White sanitized N95 respirator with elastic yellow straps | 4          |
| 3M 8210 Plus Sanitized N95 Respirator           | White sanitized N95 respirator with fabric yellow straps  | 1          |
| 3M 1860 Sanitized N95 Respirator                | Teal sanitized N95 respirator with white fabric straps    | 2          |
| Halyard Duckbill 46727 Sanitized N95 Respirator | Peach and white sanitized N95 respirator                  | 2          |

Date provided by the Client: 20 April 2020  
 Date Testing Authorized: 20 April 2020  
 Dates of tests: 23-24 April 2020  
 Manufacturer/Supplier: Dana Farber Cancer Institute

**Equipment:**

*TSI 8130A Filter Tester*, test bench configured for sodium chloride aerosol (EQ1279).  
*Mask Fixture*, Custom design ICS Labs  
*Humidity chamber*, Envirotronics (EQ0327)  
*Sodium Chloride*, 99+%, Fisher Chemical, (C0015-03)

**Procedure:**

All tests were conducted in a standard laboratory atmosphere unless otherwise specified. The equipment and instrument calibrations were verified current and within specification prior to use. The materials for assessment were inventoried and logged upon receipt. Sample ID’s were assigned by Dana Farber Cancer Institute.

The equipment and instrument calibrations for sodium chloride penetration were verified current and within specification prior to use. All testing procedures were in general accordance with those specified in NIOSH Procedure No TEB-APR-STP-0059.

Issued to: Dana Farber Cancer Institute  
 375 Longwood Ave. 5<sup>th</sup> Floor  
 Boston, MA 02115  
 USA

Date: 30 April 2020  
 Report: T14580-01-1  
 Issue: 1  
 Page: 2 of 10

**Procedure (cont.):**

Respirators were challenged with a sodium chloride aerosol neutralized to a Boltzmann equilibrium state at 25 +/- 5°C and a relative humidity of 30 +/- 10%. Particle size distribution was verified to be a count median diameter of 0.075 +/- 0.020 microns, with a geometric standard deviation not exceeding 1.86.

The respirators were conditioned at 85 % +/- 5 % relative humidity and 38°C +/- 2°C for 25 hours prior to the filter efficiency test.

Instantaneous testing was performed on the following: 3M 9210 N95 respirator, Gerson 2130 N95 respirator, and three 3M 8210 N95 respirators upon the client’s request. Each respirator was assembled into a fixture and subjected to instantaneous loading at 85 LPM for one minute.

The following: 3M 8210 Plus respirator, 3M 8210 respirator, two 3M 1860 N95 respirators, and two Halyard Duckbills 46727 respirators were assembled into a fixture and subjected to aerosol loading upon the client’s request. The loading was performed by depositing 200 mg of sodium chloride aerosol at airflow rate of 85 LPM. Flow rate was monitored every 5-10 minutes on average and adjusted to maintain a flow rate of 85 LPM +/- 2 LPM. The initial flow rate, initial resistance, initial penetration and maximum penetration data were recorded.

**Results:**

Table I outlines the results of the instantaneous loading tests.

**Table I**

Instantaneous Sodium Chloride Filter Efficiency Results for 3M 9210, Gerson 2130, and 3M 8210 sanitized(5x) N95 respirators

| <i>Sample ID</i>       | <i>Flow Rate (LPM)</i> | <i>Initial Resistance (mm of H<sub>2</sub>O)</i> | <i>Instantaneous Penetration (%)</i> | <i>Instantaneous Filter Efficiency (%)</i> | <i>Result</i> |
|------------------------|------------------------|--------------------------------------------------|--------------------------------------|--------------------------------------------|---------------|
| <b>3M 9210(5x)</b>     | 85                     | 10.4                                             | 0.07                                 | 99.93                                      | Pass          |
| <b>Gerson 2130(5x)</b> | 85                     | 9.8                                              | 1.35                                 | 98.65                                      | Pass          |
| <b>3M 8210(5x)-01</b>  | 85                     | 9.3                                              | 0.21                                 | 99.79                                      | Pass          |
| <b>3M 8210(5x)-02</b>  | 85                     | 9.1                                              | 0.43                                 | 99.57                                      | Pass          |
| <b>3M 8210(5x)-03</b>  | 85                     | 9.8                                              | 0.21                                 | 99.79                                      | Pass          |
| <b>Specification:</b>  | <b>81- 89</b>          |                                                  | <b>≤ 5.0</b>                         | <b>≥ 95.0</b>                              |               |

Table II outlines the results of the full loading tests. The individual loading profiles of each respirator as well as tabular loading data are available in the appendix of this report.

Issued to: Dana Farber Cancer Institute  
 375 Longwood Ave. 5<sup>th</sup> Floor  
 Boston, MA 02115  
 USA

Date: 30 April 2020  
 Report: T14580-01-1  
 Issue: 1  
 Page: 3 of 10

**Results (cont.):**

**Table II**

Sodium Chloride Full Loading Filter Efficiency Results for 3M 8210, 3M 8210 Plus, 3M 1860, and Halyard Duckbills 46727 sanitized(5x) N95 respirators

| <i>Sample ID</i>      | <i>Initial Flow Rate (LPM)</i> | <i>Initial Resistance (mm of H<sub>2</sub>O)</i> | <i>Initial Penetration (%)</i> | <i>Maximum Penetration (%)</i> | <i>Filter Efficiency (%)</i> | <i>Result</i> |
|-----------------------|--------------------------------|--------------------------------------------------|--------------------------------|--------------------------------|------------------------------|---------------|
| 3M 8210(5x)-04        | 85                             | 9.8                                              | 0.29                           | 1.77                           | 98.23                        | Pass          |
| 3M 8210 Plus(5x)      | 85                             | 9.9                                              | 0.49                           | 1.84                           | 98.16                        | Pass          |
| 3M 1860(5x)-01        | 85                             | 9.6                                              | 1.22                           | 4.40                           | 95.60                        | Pass          |
| 3M 1860(5x)-02        | 85                             | 9.8                                              | 0.94                           | 4.11                           | 95.89                        | Pass          |
| Halyard(5x)-01        | 85                             | 15.5                                             | 1.40                           | 1.40                           | 98.60                        | Pass          |
| Halyard(5x)-02        | 85                             | 14.8                                             | 0.13                           | 0.13                           | 99.87                        | Pass          |
| <b>Specification:</b> | <b>81- 89</b>                  |                                                  |                                | <b>≤ 5.0</b>                   | <b>≥ 95.0</b>                |               |

Filter performance graph, 3M 8210(5x)-04 N95 respirator.

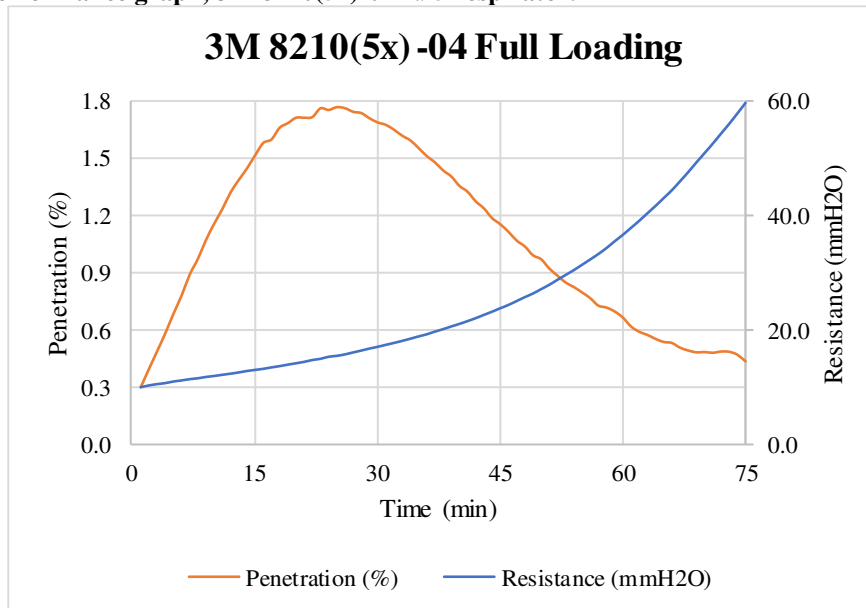

Issued to: Dana Farber Cancer Institute  
 375 Longwood Ave. 5<sup>th</sup> Floor  
 Boston, MA 02115  
 USA

Date: 30 April 2020  
 Report: T14580-01-1  
 Issue: 1  
 Page: 4 of 10

**Results (cont.):**

**Filter performance graph, 3M 8210 Plus(5x) N95 respirator.**

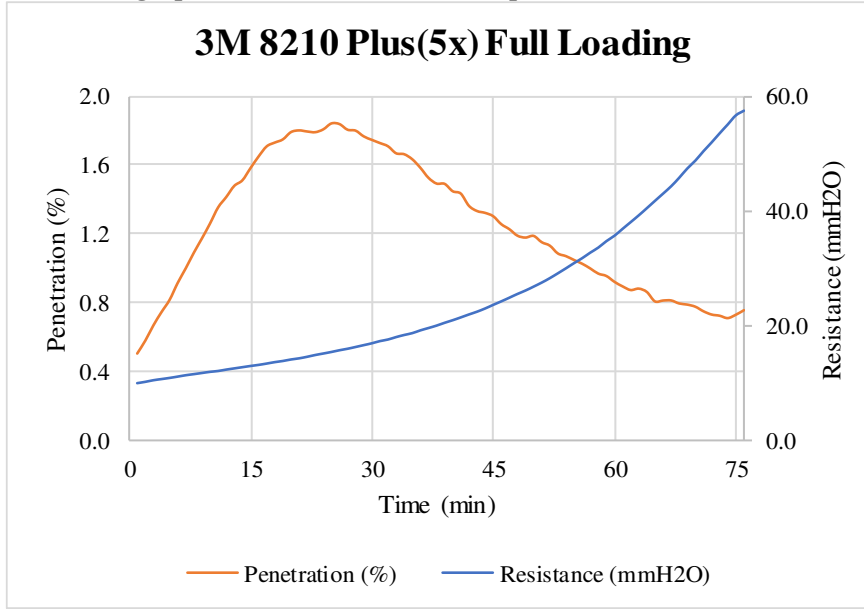

**Filter performance graph, 3M 1860(5x)-01 N95 respirator.**

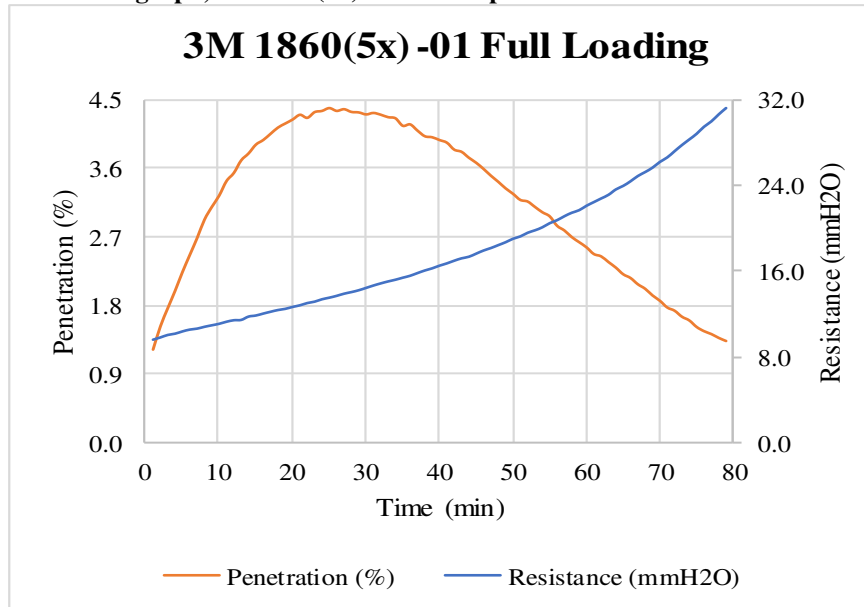

Issued to: Dana Farber Cancer Institute  
 375 Longwood Ave. 5<sup>th</sup> Floor  
 Boston, MA 02115  
 USA

Date: 30 April 2020  
 Report: T14580-01-1  
 Issue: 1  
 Page: 5 of 10

**Results (cont.):**

**Filter performance graph, 3M 1860(5x)-02 N95 respirator.**

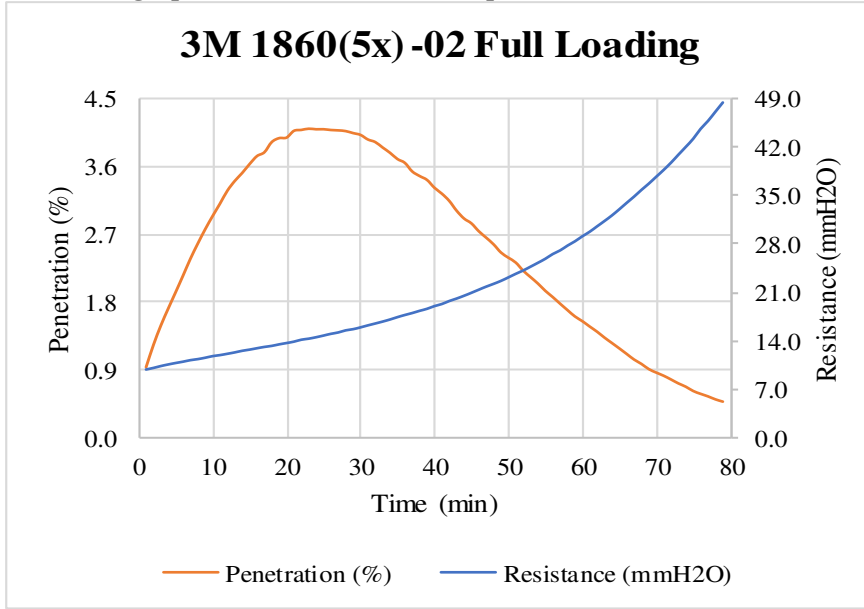

**Filter performance graph, Halyard(5x)-01 N95 respirator.**

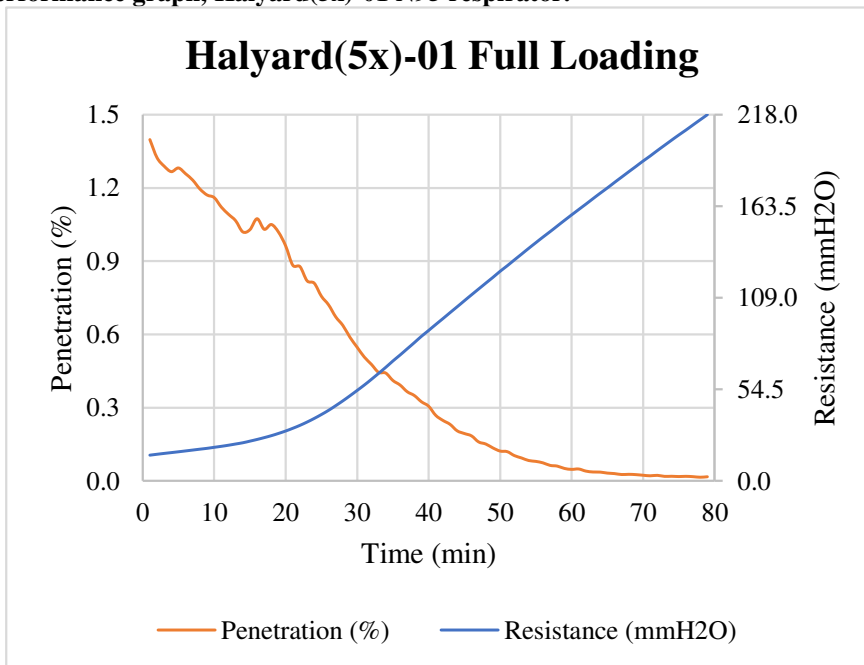



Issued to: Dana Farber Cancer Institute  
 375 Longwood Ave. 5<sup>th</sup> Floor  
 Boston, MA 02115  
 USA

Date: 30 April 2020  
 Report: T14580-01-1  
 Issue: 1  
 Page: 6 of 10

**Results (cont.):**

**Filter performance graph, Halyard(5x)-02 N95 respirator.**

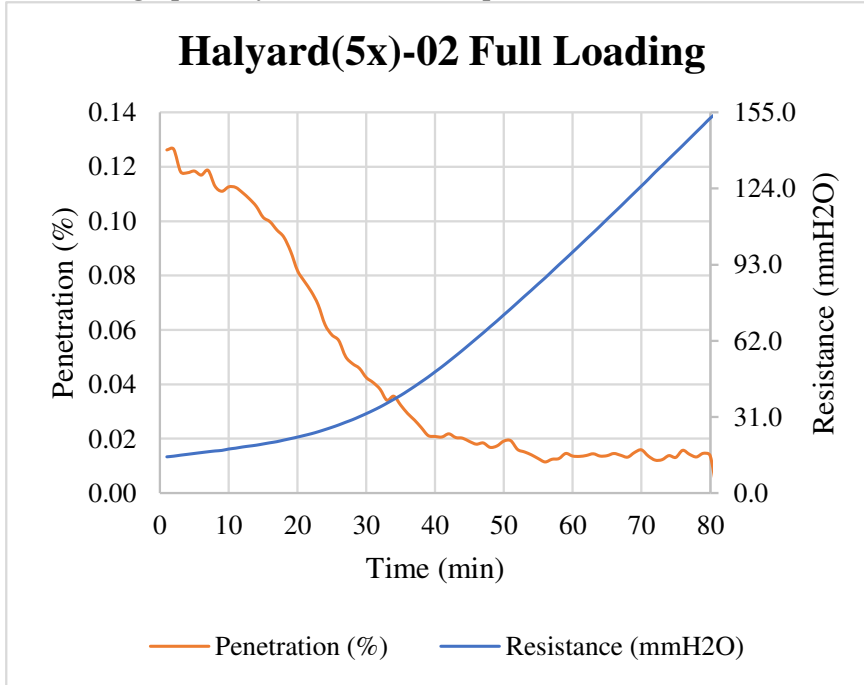

**Photographs:**

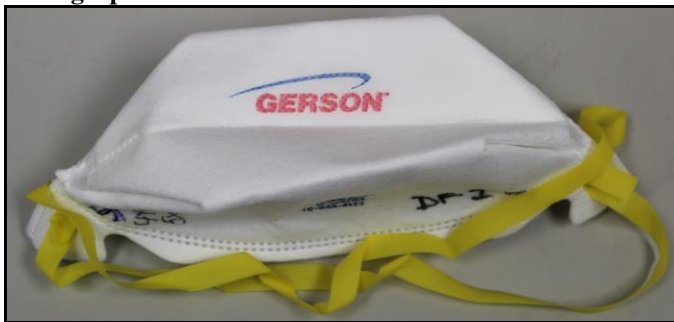

**Figure 1.** Gerson 2130 sanitized(5x) N95 respirator.

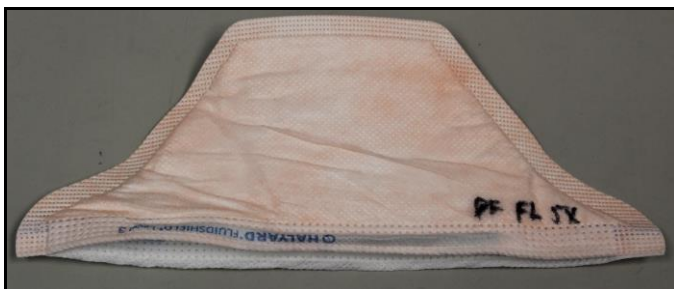

**Figure 2.** Halyard Duckbills 46727 sanitized(5x) N95 respirator.

Issued to: Dana Farber Cancer Institute  
375 Longwood Ave. 5<sup>th</sup> Floor  
Boston, MA 02115  
USA

Date: 30 April 2020  
Report: T14580-01-1  
Issue: 1  
Page: 7 of 10

**Photographs (cont.):**

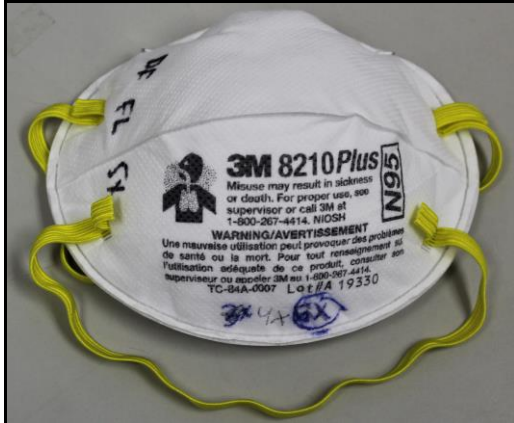

**Figure 3.** 3M 8210 Plus sanitized(5x) N95 respirator.

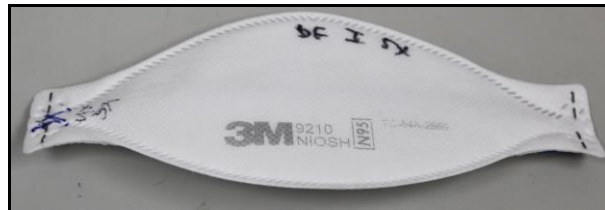

**Figure 4.** 3M 9210 sanitized(5x) N95 respirator.

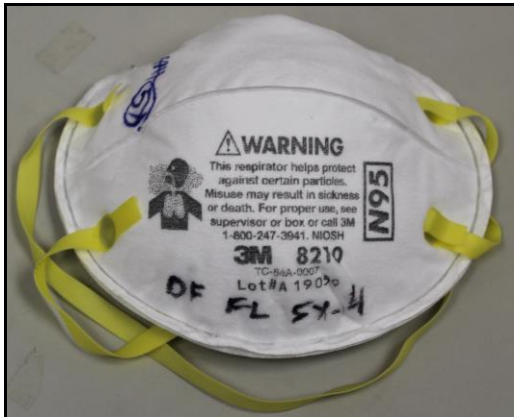

**Figure 5.** 3M 8210 sanitized(5x) N95 respirator.

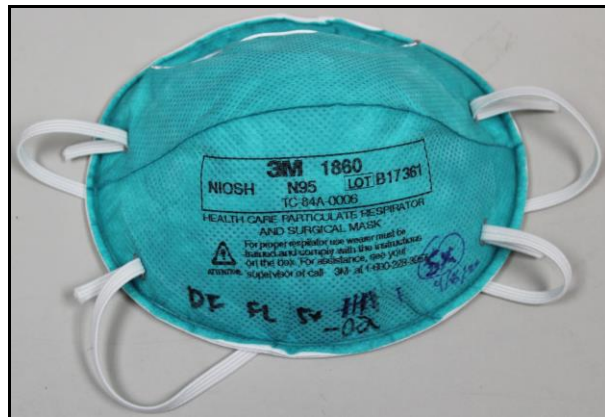

**Figure 6.** 3M 1860 sanitized(5x) N95 respirator.

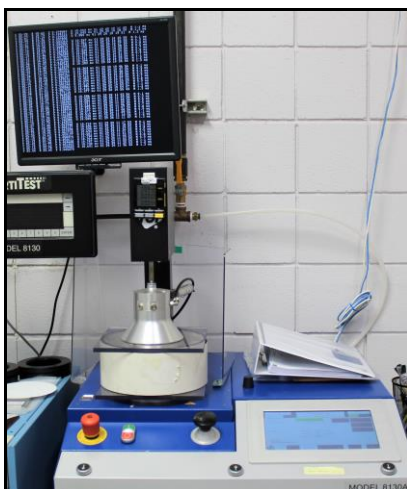

**Figure 7:** Respirator under test.

Issued to: Dana Farber Cancer Institute  
 375 Longwood Ave. 5<sup>th</sup> Floor  
 Boston, MA 02115  
 USA

Date: 30 April 2020  
 Report: T14580-01-1  
 Issue: 1  
 Page: 8 of 10

**Appendix:**

**Loading data for 3M 8210(5x)-04**

| Time (min) | Flow (LPM) | Resistance (mmH <sub>2</sub> O) | % Penetration | Time (min) | Flow (LPM) | Resistance (mmH <sub>2</sub> O) | % Penetration | Time (min) | Flow (LPM) | Resistance (mmH <sub>2</sub> O) | % Penetration |
|------------|------------|---------------------------------|---------------|------------|------------|---------------------------------|---------------|------------|------------|---------------------------------|---------------|
| 1          | 85.12      | 9.75                            | 0.30          | 26         | 84.72      | 15.50                           | 1.76          | 51         | 84.67      | 27.68                           | 0.92          |
| 2          | 85.05      | 10.06                           | 0.39          | 27         | 84.72      | 15.84                           | 1.74          | 52         | 84.64      | 28.55                           | 0.88          |
| 3          | 85.00      | 10.29                           | 0.49          | 28         | 84.71      | 16.17                           | 1.74          | 53         | 84.64      | 29.40                           | 0.85          |
| 4          | 84.94      | 10.47                           | 0.58          | 29         | 84.70      | 16.52                           | 1.71          | 54         | 84.66      | 30.24                           | 0.82          |
| 5          | 84.90      | 10.75                           | 0.68          | 30         | 84.72      | 16.82                           | 1.69          | 55         | 84.63      | 31.17                           | 0.79          |
| 6          | 84.86      | 10.94                           | 0.78          | 31         | 84.72      | 17.17                           | 1.67          | 56         | 84.63      | 32.10                           | 0.76          |
| 7          | 84.82      | 11.16                           | 0.89          | 32         | 84.72      | 17.50                           | 1.65          | 57         | 84.61      | 33.06                           | 0.73          |
| 8          | 84.78      | 11.32                           | 0.97          | 33         | 84.72      | 17.86                           | 1.62          | 58         | 84.61      | 34.11                           | 0.71          |
| 9          | 84.77      | 11.55                           | 1.07          | 34         | 84.71      | 18.24                           | 1.59          | 59         | 84.60      | 35.29                           | 0.69          |
| 10         | 84.78      | 11.72                           | 1.16          | 35         | 84.73      | 18.64                           | 1.55          | 60         | 84.56      | 36.42                           | 0.66          |
| 11         | 84.76      | 11.93                           | 1.23          | 36         | 84.69      | 19.01                           | 1.51          | 61         | 84.55      | 37.64                           | 0.62          |
| 12         | 84.75      | 12.12                           | 1.32          | 37         | 84.72      | 19.48                           | 1.48          | 62         | 84.55      | 38.87                           | 0.59          |
| 13         | 84.73      | 12.34                           | 1.39          | 38         | 84.72      | 19.91                           | 1.44          | 63         | 84.54      | 40.18                           | 0.57          |
| 14         | 84.72      | 12.59                           | 1.45          | 39         | 84.73      | 20.38                           | 1.40          | 64         | 84.52      | 41.48                           | 0.55          |
| 15         | 84.73      | 12.78                           | 1.52          | 40         | 84.72      | 20.83                           | 1.35          | 65         | 84.52      | 42.85                           | 0.53          |
| 16         | 84.75      | 12.97                           | 1.58          | 41         | 84.73      | 21.32                           | 1.32          | 66         | 84.52      | 44.23                           | 0.53          |
| 17         | 84.72      | 13.22                           | 1.60          | 42         | 84.73      | 21.84                           | 1.27          | 67         | 84.49      | 45.79                           | 0.50          |
| 18         | 84.74      | 13.44                           | 1.66          | 43         | 84.69      | 22.41                           | 1.24          | 68         | 84.48      | 47.39                           | 0.49          |
| 19         | 84.72      | 13.70                           | 1.68          | 44         | 84.69      | 22.97                           | 1.18          | 69         | 84.47      | 49.08                           | 0.48          |
| 20         | 84.72      | 13.94                           | 1.71          | 45         | 84.71      | 23.57                           | 1.15          | 70         | 84.44      | 50.72                           | 0.48          |
| 21         | 84.72      | 14.19                           | 1.71          | 46         | 84.69      | 24.15                           | 1.11          | 71         | 84.42      | 52.37                           | 0.48          |
| 22         | 84.73      | 14.51                           | 1.72          | 47         | 84.68      | 24.83                           | 1.07          | 72         | 84.40      | 54.10                           | 0.48          |
| 23         | 84.72      | 14.72                           | 1.76          | 48         | 84.70      | 25.51                           | 1.04          | 73         | 84.39      | 55.82                           | 0.48          |
| 24         | 84.73      | 15.08                           | 1.75          | 49         | 84.70      | 26.15                           | 0.99          | 74         | 84.37      | 57.63                           | 0.47          |
| 25         | 84.73      | 15.24                           | 1.77          | 50         | 84.66      | 26.91                           | 0.97          | 75         | 84.35      | 59.49                           | 0.43          |

**Loading data for 3M 8210 Plus(5x)**

| Time (min) | Flow (LPM) | Resistance (mmH <sub>2</sub> O) | % Penetration | Time (min) | Flow (LPM) | Resistance (mmH <sub>2</sub> O) | % Penetration | Time (min) | Flow (LPM) | Resistance (mmH <sub>2</sub> O) | % Penetration |
|------------|------------|---------------------------------|---------------|------------|------------|---------------------------------|---------------|------------|------------|---------------------------------|---------------|
| 1          | 84.91      | 9.85                            | 0.50          | 27         | 84.82      | 15.84                           | 1.81          | 53         | 84.68      | 28.98                           | 1.08          |
| 2          | 84.93      | 10.08                           | 0.57          | 28         | 84.80      | 16.15                           | 1.80          | 54         | 84.66      | 29.85                           | 1.07          |
| 3          | 84.94      | 10.36                           | 0.66          | 29         | 84.80      | 16.47                           | 1.77          | 55         | 84.66      | 30.75                           | 1.04          |
| 4          | 84.90      | 10.56                           | 0.74          | 30         | 84.80      | 16.79                           | 1.75          | 56         | 84.65      | 31.61                           | 1.02          |
| 5          | 84.91      | 10.76                           | 0.81          | 31         | 84.79      | 17.17                           | 1.73          | 57         | 84.65      | 32.57                           | 1.00          |
| 6          | 84.90      | 10.99                           | 0.91          | 32         | 84.81      | 17.45                           | 1.71          | 58         | 84.65      | 33.46                           | 0.96          |
| 7          | 84.90      | 11.23                           | 1.00          | 33         | 84.79      | 17.87                           | 1.67          | 59         | 84.64      | 34.58                           | 0.95          |
| 8          | 84.89      | 11.42                           | 1.09          | 34         | 84.80      | 18.24                           | 1.66          | 60         | 84.63      | 35.53                           | 0.92          |
| 9          | 84.88      | 11.62                           | 1.17          | 35         | 84.81      | 18.56                           | 1.63          | 61         | 84.60      | 36.72                           | 0.89          |
| 10         | 84.89      | 11.82                           | 1.26          | 36         | 84.82      | 19.04                           | 1.58          | 62         | 84.59      | 37.89                           | 0.87          |
| 11         | 84.87      | 11.97                           | 1.35          | 37         | 84.78      | 19.45                           | 1.53          | 63         | 84.59      | 39.07                           | 0.88          |
| 12         | 84.87      | 12.21                           | 1.41          | 38         | 84.78      | 19.87                           | 1.49          | 64         | 84.60      | 40.32                           | 0.86          |
| 13         | 84.87      | 12.42                           | 1.48          | 39         | 84.79      | 20.36                           | 1.49          | 65         | 84.56      | 41.59                           | 0.80          |
| 14         | 84.85      | 12.63                           | 1.51          | 40         | 84.79      | 20.81                           | 1.45          | 66         | 84.57      | 42.85                           | 0.81          |
| 15         | 84.85      | 12.84                           | 1.58          | 41         | 84.77      | 21.30                           | 1.43          | 67         | 84.54      | 44.13                           | 0.81          |
| 16         | 84.84      | 13.03                           | 1.65          | 42         | 84.75      | 21.81                           | 1.36          | 68         | 84.53      | 45.62                           | 0.79          |
| 17         | 84.86      | 13.26                           | 1.71          | 43         | 84.78      | 22.29                           | 1.33          | 69         | 84.51      | 47.23                           | 0.78          |
| 18         | 84.84      | 13.51                           | 1.73          | 44         | 84.74      | 22.85                           | 1.32          | 70         | 84.50      | 48.61                           | 0.77          |
| 19         | 84.85      | 13.71                           | 1.75          | 45         | 84.72      | 23.48                           | 1.30          | 71         | 84.47      | 50.24                           | 0.74          |
| 20         | 84.83      | 13.97                           | 1.79          | 46         | 84.74      | 24.09                           | 1.25          | 72         | 84.46      | 51.76                           | 0.73          |
| 21         | 84.82      | 14.17                           | 1.80          | 47         | 84.72      | 24.73                           | 1.23          | 73         | 84.46      | 53.36                           | 0.72          |
| 22         | 84.83      | 14.44                           | 1.80          | 48         | 84.71      | 25.38                           | 1.19          | 74         | 84.46      | 54.90                           | 0.70          |
| 23         | 84.81      | 14.75                           | 1.79          | 49         | 84.71      | 25.98                           | 1.18          | 75         | 84.45      | 56.48                           | 0.72          |
| 24         | 84.81      | 15.01                           | 1.81          | 50         | 84.68      | 26.66                           | 1.19          | 76         | 84.43      | 57.29                           | 0.75          |
| 25         | 84.80      | 15.28                           | 1.84          | 51         | 84.68      | 27.36                           | 1.15          |            |            |                                 |               |
| 26         | 84.81      | 15.58                           | 1.84          | 52         | 84.70      | 28.13                           | 1.13          |            |            |                                 |               |

Issued to: Dana Farber Cancer Institute  
 375 Longwood Ave. 5<sup>th</sup> Floor  
 Boston, MA 02115  
 USA

Date: 30 April 2020  
 Report: T14580-01-1  
 Issue: 1  
 Page: 9 of 10

**Appendix (cont.):**

**Loading data for 3M 1860(5x)-01**

| Time (min) | Flow (LPM) | Resistance (mmH <sub>2</sub> O) | % Penetration | Time (min) | Flow (LPM) | Resistance (mmH <sub>2</sub> O) | % Penetration | Time (min) | Flow (LPM) | Resistance (mmH <sub>2</sub> O) | % Penetration |
|------------|------------|---------------------------------|---------------|------------|------------|---------------------------------|---------------|------------|------------|---------------------------------|---------------|
| 1          | 84.88      | 9.62                            | 1.22          | 28         | 84.52      | 14.05                           | 4.35          | 55         | 84.51      | 20.46                           | 2.98          |
| 2          | 84.80      | 9.83                            | 1.53          | 29         | 84.55      | 14.22                           | 4.34          | 56         | 84.51      | 20.74                           | 2.85          |
| 3          | 84.76      | 10.06                           | 1.77          | 30         | 84.56      | 14.44                           | 4.32          | 57         | 84.50      | 21.11                           | 2.79          |
| 4          | 84.70      | 10.18                           | 2.00          | 31         | 84.56      | 14.66                           | 4.34          | 58         | 84.51      | 21.43                           | 2.70          |
| 5          | 84.68      | 10.39                           | 2.24          | 32         | 84.56      | 14.86                           | 4.31          | 59         | 84.49      | 21.67                           | 2.64          |
| 6          | 84.66      | 10.56                           | 2.47          | 33         | 84.54      | 15.04                           | 4.28          | 60         | 84.49      | 22.08                           | 2.57          |
| 7          | 84.62      | 10.65                           | 2.69          | 34         | 84.55      | 15.20                           | 4.27          | 61         | 84.51      | 22.42                           | 2.48          |
| 8          | 84.58      | 10.82                           | 2.93          | 35         | 84.55      | 15.39                           | 4.17          | 62         | 84.52      | 22.76                           | 2.45          |
| 9          | 84.56      | 10.96                           | 3.10          | 36         | 84.52      | 15.57                           | 4.19          | 63         | 84.51      | 23.10                           | 2.38          |
| 10         | 84.55      | 11.10                           | 3.25          | 37         | 84.53      | 15.82                           | 4.11          | 64         | 84.50      | 23.60                           | 2.30          |
| 11         | 84.54      | 11.29                           | 3.44          | 38         | 84.53      | 16.06                           | 4.03          | 65         | 84.48      | 23.93                           | 2.21          |
| 12         | 84.54      | 11.43                           | 3.55          | 39         | 84.55      | 16.26                           | 4.02          | 66         | 84.49      | 24.36                           | 2.17          |
| 13         | 84.52      | 11.46                           | 3.71          | 40         | 84.54      | 16.51                           | 3.98          | 67         | 84.49      | 24.85                           | 2.08          |
| 14         | 84.53      | 11.77                           | 3.81          | 41         | 84.56      | 16.72                           | 3.95          | 68         | 84.48      | 25.22                           | 2.02          |
| 15         | 84.52      | 11.87                           | 3.92          | 42         | 84.56      | 16.97                           | 3.86          | 69         | 84.48      | 25.63                           | 1.94          |
| 16         | 84.51      | 12.05                           | 3.98          | 43         | 84.53      | 17.19                           | 3.83          | 70         | 84.48      | 26.16                           | 1.87          |
| 17         | 84.51      | 12.22                           | 4.06          | 44         | 84.55      | 17.34                           | 3.75          | 71         | 84.47      | 26.58                           | 1.78          |
| 18         | 84.53      | 12.38                           | 4.15          | 45         | 84.53      | 17.63                           | 3.68          | 72         | 84.47      | 27.16                           | 1.73          |
| 19         | 84.53      | 12.49                           | 4.20          | 46         | 84.54      | 17.92                           | 3.60          | 73         | 84.46      | 27.73                           | 1.66          |
| 20         | 84.53      | 12.67                           | 4.25          | 47         | 84.52      | 18.15                           | 3.51          | 74         | 84.45      | 28.25                           | 1.61          |
| 21         | 84.55      | 12.82                           | 4.31          | 48         | 84.53      | 18.42                           | 3.43          | 75         | 84.48      | 28.78                           | 1.52          |
| 22         | 84.53      | 13.03                           | 4.27          | 49         | 84.53      | 18.69                           | 3.35          | 76         | 84.44      | 29.43                           | 1.47          |
| 23         | 84.54      | 13.16                           | 4.35          | 50         | 84.51      | 19.01                           | 3.27          | 77         | 84.44      | 29.93                           | 1.43          |
| 24         | 84.51      | 13.38                           | 4.36          | 51         | 84.52      | 19.23                           | 3.19          | 78         | 84.43      | 30.58                           | 1.38          |
| 25         | 84.54      | 13.53                           | 4.40          | 52         | 84.53      | 19.57                           | 3.17          | 79         | 84.40      | 31.17                           | 1.34          |
| 26         | 84.53      | 13.70                           | 4.37          | 53         | 84.51      | 19.80                           | 3.10          |            |            |                                 |               |
| 27         | 84.52      | 13.90                           | 4.39          | 54         | 84.52      | 20.08                           | 3.03          |            |            |                                 |               |

**Loading data for 3M 1860(5x)-02**

| Time (min) | Flow (LPM) | Resistance (mmH <sub>2</sub> O) | % Penetration | Time (min) | Flow (LPM) | Resistance (mmH <sub>2</sub> O) | % Penetration | Time (min) | Flow (LPM) | Resistance (mmH <sub>2</sub> O) | % Penetration |
|------------|------------|---------------------------------|---------------|------------|------------|---------------------------------|---------------|------------|------------|---------------------------------|---------------|
| 1          | 84.64      | 9.80                            | 0.94          | 28         | 84.58      | 15.45                           | 4.07          | 55         | 84.51      | 25.78                           | 1.95          |
| 2          | 84.66      | 10.03                           | 1.23          | 29         | 84.59      | 15.62                           | 4.05          | 56         | 84.51      | 26.46                           | 1.87          |
| 3          | 84.68      | 10.30                           | 1.49          | 30         | 84.58      | 15.88                           | 4.02          | 57         | 84.48      | 26.99                           | 1.78          |
| 4          | 84.66      | 10.53                           | 1.72          | 31         | 84.58      | 16.17                           | 3.96          | 58         | 84.47      | 27.68                           | 1.70          |
| 5          | 84.65      | 10.74                           | 1.93          | 32         | 84.57      | 16.44                           | 3.93          | 59         | 84.45      | 28.30                           | 1.61          |
| 6          | 84.65      | 10.93                           | 2.15          | 33         | 84.58      | 16.72                           | 3.86          | 60         | 84.48      | 29.02                           | 1.55          |
| 7          | 84.64      | 11.15                           | 2.38          | 34         | 84.59      | 17.02                           | 3.79          | 61         | 84.43      | 29.68                           | 1.48          |
| 8          | 84.62      | 11.30                           | 2.58          | 35         | 84.55      | 17.36                           | 3.70          | 62         | 84.46      | 30.46                           | 1.41          |
| 9          | 84.63      | 11.50                           | 2.77          | 36         | 84.57      | 17.67                           | 3.65          | 63         | 84.44      | 31.23                           | 1.33          |
| 10         | 84.63      | 11.73                           | 2.95          | 37         | 84.55      | 17.95                           | 3.54          | 64         | 84.41      | 32.03                           | 1.26          |
| 11         | 84.63      | 11.88                           | 3.11          | 38         | 84.56      | 18.27                           | 3.48          | 65         | 84.39      | 32.92                           | 1.19          |
| 12         | 84.61      | 12.07                           | 3.28          | 39         | 84.55      | 18.56                           | 3.42          | 66         | 84.41      | 33.85                           | 1.11          |
| 13         | 84.60      | 12.27                           | 3.41          | 40         | 84.56      | 18.95                           | 3.32          | 67         | 84.39      | 34.75                           | 1.04          |
| 14         | 84.60      | 12.50                           | 3.52          | 41         | 84.55      | 19.25                           | 3.24          | 68         | 84.40      | 35.72                           | 0.98          |
| 15         | 84.60      | 12.67                           | 3.64          | 42         | 84.55      | 19.68                           | 3.15          | 69         | 84.38      | 36.63                           | 0.91          |
| 16         | 84.59      | 12.87                           | 3.74          | 43         | 84.55      | 20.04                           | 3.02          | 70         | 84.37      | 37.62                           | 0.87          |
| 17         | 84.61      | 13.06                           | 3.79          | 44         | 84.54      | 20.44                           | 2.91          | 71         | 84.38      | 38.60                           | 0.82          |
| 18         | 84.60      | 13.21                           | 3.93          | 45         | 84.55      | 20.87                           | 2.85          | 72         | 84.32      | 39.65                           | 0.77          |
| 19         | 84.58      | 13.43                           | 3.98          | 46         | 84.54      | 21.32                           | 2.74          | 73         | 84.30      | 40.80                           | 0.72          |
| 20         | 84.57      | 13.62                           | 3.99          | 47         | 84.55      | 21.76                           | 2.66          | 74         | 84.32      | 41.93                           | 0.68          |
| 21         | 84.60      | 13.82                           | 4.08          | 48         | 84.56      | 22.16                           | 2.57          | 75         | 84.31      | 43.10                           | 0.62          |
| 22         | 84.56      | 14.10                           | 4.09          | 49         | 84.55      | 22.59                           | 2.46          | 76         | 84.27      | 44.52                           | 0.58          |
| 23         | 84.57      | 14.25                           | 4.11          | 50         | 84.52      | 23.09                           | 2.39          | 77         | 84.27      | 45.67                           | 0.55          |
| 24         | 84.58      | 14.46                           | 4.10          | 51         | 84.54      | 23.61                           | 2.33          | 78         | 84.27      | 47.00                           | 0.51          |
| 25         | 84.57      | 14.70                           | 4.10          | 52         | 84.55      | 24.09                           | 2.22          | 79         | 84.24      | 48.33                           | 0.48          |
| 26         | 84.58      | 14.95                           | 4.09          | 53         | 84.53      | 24.64                           | 2.13          |            |            |                                 |               |
| 27         | 84.57      | 15.15                           | 4.08          | 54         | 84.51      | 25.20                           | 2.05          |            |            |                                 |               |

Issued to: Dana Farber Cancer Institute  
 375 Longwood Ave. 5<sup>th</sup> Floor  
 Boston, MA 02115  
 USA

Date: 30 April 2020  
 Report: T14580-01-1  
 Issue: 1  
 Page: 10 of 10

**Appendix (cont.):**

**Loading data for Halyard(5x)-01**

| Time (min) | Flow (LPM) | Resistance (mmH <sub>2</sub> O) | % Penetration | Time (min) | Flow (LPM) | Resistance (mmH <sub>2</sub> O) | % Penetration | Time (min) | Flow (LPM) | Resistance (mmH <sub>2</sub> O) | % Penetration |
|------------|------------|---------------------------------|---------------|------------|------------|---------------------------------|---------------|------------|------------|---------------------------------|---------------|
| 1          | 84.64      | 15.45                           | 1.40          | 28         | 84.30      | 47.76                           | 0.64          | 55         | 83.54      | 141.84                          | 0.08          |
| 2          | 84.67      | 15.98                           | 1.32          | 29         | 84.26      | 50.80                           | 0.59          | 56         | 83.53      | 145.18                          | 0.07          |
| 3          | 84.66      | 16.49                           | 1.29          | 30         | 84.23      | 53.95                           | 0.55          | 57         | 83.50      | 148.42                          | 0.06          |
| 4          | 84.63      | 16.97                           | 1.27          | 31         | 84.18      | 57.15                           | 0.51          | 58         | 83.46      | 151.76                          | 0.06          |
| 5          | 84.62      | 17.46                           | 1.28          | 32         | 84.15      | 60.56                           | 0.48          | 59         | 83.43      | 155.09                          | 0.05          |
| 6          | 84.61      | 17.97                           | 1.26          | 33         | 84.12      | 64.10                           | 0.44          | 60         | 83.40      | 158.35                          | 0.05          |
| 7          | 84.60      | 18.49                           | 1.23          | 34         | 84.10      | 67.68                           | 0.44          | 61         | 83.37      | 161.57                          | 0.05          |
| 8          | 84.58      | 19.01                           | 1.19          | 35         | 84.06      | 71.46                           | 0.41          | 62         | 83.36      | 164.77                          | 0.04          |
| 9          | 84.59      | 19.51                           | 1.17          | 36         | 84.03      | 75.01                           | 0.39          | 63         | 83.33      | 168.04                          | 0.04          |
| 10         | 84.58      | 20.12                           | 1.16          | 37         | 83.99      | 78.69                           | 0.37          | 64         | 83.29      | 171.26                          | 0.04          |
| 11         | 84.55      | 20.71                           | 1.12          | 38         | 83.97      | 82.38                           | 0.35          | 65         | 83.27      | 174.38                          | 0.03          |
| 12         | 84.53      | 21.36                           | 1.09          | 39         | 83.93      | 86.17                           | 0.32          | 66         | 83.23      | 177.65                          | 0.03          |
| 13         | 84.53      | 22.09                           | 1.07          | 40         | 83.94      | 89.63                           | 0.31          | 67         | 83.21      | 180.85                          | 0.03          |
| 14         | 84.53      | 22.82                           | 1.02          | 41         | 83.91      | 93.20                           | 0.27          | 68         | 83.16      | 184.05                          | 0.03          |
| 15         | 84.52      | 23.79                           | 1.03          | 42         | 83.90      | 96.67                           | 0.25          | 69         | 83.14      | 187.19                          | 0.03          |
| 16         | 84.51      | 24.79                           | 1.07          | 43         | 83.87      | 100.23                          | 0.23          | 70         | 83.10      | 190.39                          | 0.02          |
| 17         | 84.50      | 25.88                           | 1.03          | 44         | 83.83      | 103.74                          | 0.21          | 71         | 83.08      | 193.42                          | 0.02          |
| 18         | 84.49      | 27.05                           | 1.05          | 45         | 83.82      | 107.30                          | 0.19          | 72         | 83.03      | 196.64                          | 0.02          |
| 19         | 84.51      | 28.38                           | 1.02          | 46         | 83.78      | 110.83                          | 0.18          | 73         | 83.03      | 199.74                          | 0.02          |
| 20         | 84.47      | 29.82                           | 0.96          | 47         | 83.75      | 114.30                          | 0.16          | 74         | 83.00      | 202.85                          | 0.02          |
| 21         | 84.48      | 31.44                           | 0.88          | 48         | 83.74      | 117.79                          | 0.15          | 75         | 82.97      | 205.90                          | 0.02          |
| 22         | 84.45      | 33.19                           | 0.88          | 49         | 83.70      | 121.22                          | 0.14          | 76         | 82.93      | 208.84                          | 0.02          |
| 23         | 84.42      | 35.16                           | 0.82          | 50         | 83.66      | 124.81                          | 0.12          | 77         | 82.89      | 211.92                          | 0.02          |
| 24         | 84.41      | 37.30                           | 0.81          | 51         | 83.65      | 128.12                          | 0.12          | 78         | 82.87      | 214.96                          | 0.02          |
| 25         | 84.40      | 39.63                           | 0.76          | 52         | 83.60      | 131.60                          | 0.10          | 79         | 82.83      | 217.99                          | 0.02          |
| 26         | 84.39      | 42.11                           | 0.72          | 53         | 83.60      | 135.02                          | 0.09          |            |            |                                 |               |
| 27         | 84.35      | 44.88                           | 0.67          | 54         | 83.57      | 138.48                          | 0.08          |            |            |                                 |               |

**Loading data for Halyard(5x)-02**

| Time (min) | Flow (LPM) | Resistance (mmH <sub>2</sub> O) | % Penetration | Time (min) | Flow (LPM) | Resistance (mmH <sub>2</sub> O) | % Penetration | Time (min) | Flow (LPM) | Resistance (mmH <sub>2</sub> O) | % Penetration |
|------------|------------|---------------------------------|---------------|------------|------------|---------------------------------|---------------|------------|------------|---------------------------------|---------------|
| 1          | 84.70      | 14.76                           | 0.13          | 28         | 84.52      | 29.89                           | 0.05          | 55         | 84.07      | 85.15                           | 0.01          |
| 2          | 84.74      | 15.04                           | 0.13          | 29         | 84.53      | 31.11                           | 0.05          | 56         | 84.07      | 87.62                           | 0.01          |
| 3          | 84.75      | 15.44                           | 0.12          | 30         | 84.51      | 32.35                           | 0.04          | 57         | 84.05      | 90.28                           | 0.01          |
| 4          | 84.71      | 15.78                           | 0.12          | 31         | 84.49      | 33.67                           | 0.04          | 58         | 84.03      | 92.92                           | 0.01          |
| 5          | 84.72      | 16.14                           | 0.12          | 32         | 84.47      | 35.06                           | 0.04          | 59         | 84.00      | 95.49                           | 0.01          |
| 6          | 84.70      | 16.49                           | 0.12          | 33         | 84.48      | 36.59                           | 0.03          | 60         | 83.99      | 98.11                           | 0.01          |
| 7          | 84.70      | 16.83                           | 0.12          | 34         | 84.45      | 38.18                           | 0.04          | 61         | 83.96      | 100.75                          | 0.01          |
| 8          | 84.67      | 17.15                           | 0.11          | 35         | 84.43      | 39.77                           | 0.03          | 62         | 83.93      | 103.44                          | 0.01          |
| 9          | 84.68      | 17.38                           | 0.11          | 36         | 84.45      | 41.56                           | 0.03          | 63         | 83.92      | 106.04                          | 0.01          |
| 10         | 84.67      | 17.94                           | 0.11          | 37         | 84.39      | 43.40                           | 0.03          | 64         | 83.90      | 108.72                          | 0.01          |
| 11         | 84.68      | 18.29                           | 0.11          | 38         | 84.40      | 45.32                           | 0.02          | 65         | 83.88      | 111.47                          | 0.01          |
| 12         | 84.65      | 18.77                           | 0.11          | 39         | 84.36      | 47.27                           | 0.02          | 66         | 83.85      | 114.14                          | 0.01          |
| 13         | 84.62      | 19.14                           | 0.11          | 40         | 84.37      | 49.36                           | 0.02          | 67         | 83.84      | 116.82                          | 0.01          |
| 14         | 84.65      | 19.50                           | 0.11          | 41         | 84.34      | 51.44                           | 0.02          | 68         | 83.82      | 119.58                          | 0.01          |
| 15         | 84.65      | 20.00                           | 0.10          | 42         | 84.32      | 53.65                           | 0.02          | 69         | 83.79      | 122.31                          | 0.01          |
| 16         | 84.64      | 20.49                           | 0.10          | 43         | 84.32      | 55.89                           | 0.02          | 70         | 83.78      | 125.01                          | 0.02          |
| 17         | 84.63      | 20.94                           | 0.10          | 44         | 84.28      | 58.17                           | 0.02          | 71         | 83.77      | 127.76                          | 0.01          |
| 18         | 84.64      | 21.58                           | 0.09          | 45         | 84.28      | 60.52                           | 0.02          | 72         | 83.73      | 130.65                          | 0.01          |
| 19         | 84.61      | 22.18                           | 0.09          | 46         | 84.26      | 62.89                           | 0.02          | 73         | 83.72      | 133.30                          | 0.01          |
| 20         | 84.60      | 22.80                           | 0.08          | 47         | 84.24      | 65.24                           | 0.02          | 74         | 83.68      | 136.07                          | 0.01          |
| 21         | 84.61      | 23.48                           | 0.08          | 48         | 84.22      | 67.69                           | 0.02          | 75         | 83.67      | 138.79                          | 0.01          |
| 22         | 84.60      | 24.17                           | 0.07          | 49         | 84.20      | 70.08                           | 0.02          | 76         | 83.63      | 141.51                          | 0.02          |
| 23         | 84.57      | 24.97                           | 0.07          | 50         | 84.16      | 72.59                           | 0.02          | 77         | 83.63      | 144.30                          | 0.01          |
| 24         | 84.57      | 25.86                           | 0.06          | 51         | 84.16      | 75.05                           | 0.02          | 78         | 83.59      | 147.06                          | 0.01          |
| 25         | 84.57      | 26.78                           | 0.06          | 52         | 84.13      | 77.58                           | 0.02          | 79         | 83.54      | 149.82                          | 0.01          |
| 26         | 84.55      | 27.76                           | 0.06          | 53         | 84.11      | 80.12                           | 0.02          | 80         | 83.52      | 152.62                          | 0.01          |
| 27         | 84.51      | 28.85                           | 0.05          | 54         | 84.10      | 82.59                           | 0.01          | 81         | 83.50      | 154.88                          | 0.00          |

## TERMS AND CONDITIONS

1. Client acknowledges that ICS Laboratories (ICS) performs testing services only as specified by Client. ICS does not design, warrant, supervise or monitor compliance of products or services except as specifically agreed to in writing. By their very nature, testing, analysis, and other ICS services are limited in scope and subject to expected measurement variability.
2. Client or Client's authorized representative shall be afforded the opportunity to clarify test requests and reasonable access to monitor test work, provisional to protecting the confidentiality of other clients.
3. ICS shall keep documents and information related to Client confidential and will not disclose any such information to third parties without Client permission. ICS will, however, disclose any such information in response to compulsory legal process after providing Client with a copy of such process.
4. ICS Reports apply only to the standards or procedures identified therein and to the sample (s) tested and or inspection (s) made. Test and/or inspection results are not indicative or representative of the qualities of the lot from which the sample was taken or of apparently identical or similar products.
5. ICS Test Reports and their insignia are for the exclusive use of the Client. Reports, in their entirety, may be utilized at the discretion of Clients and/or their authorized agents for purposes including, but not limited to, research & development, recordkeeping, product packaging, educational and promotional materials in various formats, certification, and compliance. As an accredited independent testing laboratory, ICS maintains an interest in preventing the misrepresentation of the contents of its test reports. As such, Clients may NOT use, reproduce or otherwise disseminate excerpted, partial, redacted or otherwise altered ICS test reports without the prior review of such use by ICS and the granting of its written approval. Further, Clients are prohibited from manipulating data and/or extrapolating-from-it statistics or conclusions that contradict or eclipse the empirical results of testing as reflected by the totality of the report. Clients are to refrain from utilizing ICS Test Reports and/or the ICS logo in a manner that suggests any extra-report conclusions are provided and/or endorsed by ICS Laboratories.
6. Any use by Client of ICS's Reports or the information contained therein is conditioned on timely payment of all fees.
7. The name(s) listed as the "Issued to" party on test reports may not reflect the actual entity submitting and/or contracting the assessment.
8. ICS shall retain copies of testing job files (including reports) for a period of at least six (6) years and when applicable, evidentiary test samples for the length of time as deemed appropriate after which time they may be disposed of at management's discretion. If Client requests additional copies of Reports during this period, an additional charge will apply for the preparation and delivery of such reports.
9. Test reports are valid for certification purposes for one year from date of issue, inclusive of retest or variant additions which must be performed within one year of date of issue to avoid full retest.
10. Client is responsible for procuring, at its cost, insurance protecting the value of its property and samples.
11. For the safety of our personnel, Client must advise if samples are known or suspected to contain hazardous substances. Safety Data Sheets must be provided upon request if available.
12. ICS represents that Services shall be performed within the limits agreed with Client, and in a manner consistent with good laboratory practice. **NO OTHER REPRESENTATIONS TO CLIENT, EXPRESS OR IMPLIED, AND NO WARRANTY OR GUARANTEE IS INCLUDED OR INTENDED IN THIS**
13. ICS hereby objects to any conflicting terms contained in any order or acceptance submitted by Client.
14. Schedules are confirmed upon acceptance of quotation. All reasonable efforts will be made to comply with conferred schedule. Guarantees are neither implied nor promised.
15. Certain work may be subcontracted to ICS authorized affiliate laboratories as required or applicable. Client will be made aware of subcontracted work.
16. Client agrees to pay any and all additional costs associated with unexpected or above-standard communications and/or consultations with Client or third parties as designated by Client.
17. Client agrees to pay any and all additional costs for work additional to the original scope of work as agreed to by Client.
18. Client understands and agrees that ICS, in entering into this Contract and by performing services hereunder, does not assume, abridge, abrogate or undertake to discharge any duty or responsibility of Client to any other party or parties. No one other than Client shall have any right to rely on any Report or other representation of conduct of ICS and ICS disclaims any obligations of any nature whatsoever with respect to such person.
19. Client agrees, in consideration of ICS undertaking to perform the test(s) hereunder, to protect, defend and indemnify ICS from any and all claims, damages, expenses either direct or consequential for injuries to persons or property arising out of or in consequence of the performance of the testing, inspection and reporting hereunder and/or the performance of the products tested or inspected hereunder, **UNLESS CAUSED BY THE NEGLIGENCE OF ICS.**
20. **IT IS AGREED THAT IF ICS SHOULD BE FOUND LIABLE FOR ANY LOSSES OR DAMAGES ATTRIBUTABLE TO THE SERVICES HEREUNDER IN ANY RESPECT, ITS LIABILITY SHALL IN NO EVENT EXCEED THE AMOUNT OF THE FEE PAID BY CLIENT FOR SUCH SERVICES AND CLIENT'S SOLE REMEDY AT LAW OR IN EQUITY SHALL BE THE RIGHT TO RECOVER UP TO SUCH AMOUNT.**
21. Quotations are valid for 30 days from date of issue. Terms: 30% Laboratory/Testing fees invoiced and payable upon acceptance of quotation. Remaining fees invoiced and payable upon completion of services, 15 days net. Cancelled jobs will be invoiced for work performed and/or set-up costs incurred. Cancelled Purchase Orders are subject to 10% service charge. Shipping costs incurred by ICS will be invoiced at cost +10% handling fee. A minimum USD \$25.00 handling fee will be also invoiced. For shipping costs incurred by Client, ICS will invoice a minimum USD \$25.00 handling fee.
22. In the event that payment is not received within 15 days of invoice date, Client agrees to pay a late payment charge on the unpaid balance equal to 1-1/2% per month or the maximum charge allowed by law, whichever is less, and all costs and expenses, including attorney's fees where recovery of the same is not prohibited by law, incurred by ICS in collecting such invoices.
23. All costs associated with compliance with any subpoena (s) for documents, testimony in a court of law, or for any other purpose relating to work performed by ICS in connection with work performed for that Client, shall be paid by Client. Client shall also pay ICS's then existing standard fee for consulting, deposition and trial testimony and all expenses related thereto.
24. Cancelled/discontinued orders: Client responsible for all administrative and testing charges up to point of cancellation.
